# Supplementary material for: New paradigms for BRCA1/BRCA2 testing in women with ovarian cancer: results of the Genetic Testing in Epithelial Ovarian Cancer (GTEOC) study
Source: PubMed Central journal article supplement — J Med Genet. 2016 May 12;53(10):655–61. doi: 10.1136/jmedgenet-2016-103902 (PMC5099175; doi:10.1136/jmedgenet-2016-103902), 2016-05-12
Supplement: jmedgenet-2016-103902supp.pdf [file jmedgenet-2016-103902supp.pdf]

**New paradigms for *BRCA1/BRCA2* testing in women with ovarian cancer – results of the Genetic Testing in Epithelial Ovarian Cancer (GTEOC) Study**

**Supplementary Files**

| Resource - activity                                                        | Unit cost (£) | Unit description                                                                                                                                                                                              | Source of data                                      |
|----------------------------------------------------------------------------|---------------|---------------------------------------------------------------------------------------------------------------------------------------------------------------------------------------------------------------|-----------------------------------------------------|
| Existing pathway                                                           |               |                                                                                                                                                                                                               |                                                     |
| Basic family history check in Oncology                                     | 19.28         | This activity involves discussing family history with the patient in order to determine whether the patient is potentially eligible for genetic testing and therefore referral to the cancer genetics service | Primary data collection at CUH NHS Foundation Trust |
| Referred to cancer genetic service (+ve FH)                                | 65.03         | Patient is sent a letter with FH form to return to cancer genetics service. FH form is received and checked and includes letter sent for appointment or for ineligibility regarding testing                   | Primary data collection at CUH NHS Foundation Trust |
| Eligible for test, offered appointment and attends cancer genetics service | 434.47        | Patient attends 45 minute appointment with genetic counsellor (70% led) and clinical geneticist (30% led) to provide counselling and offer genetic test                                                       | NHS reference costs: financial year 2014-2015       |
| Offered and accepts <i>BRCA1/BRCA2</i> genetic test                        | 850.00        | NHS test price at Addenbrooke's Hospital. Test involves sequencing of the entire coding region of genes plus copy number analysis.                                                                            | UKGTN website                                       |
| <i>BRCA1/BRCA2</i> negative                                                | 81.36         | Patient receives result as agreed during appointment either by letter (45%), phone call (45%) or face-to-face appointment (10%)                                                                               | Primary data collection at CUH NHS Foundation Trust |
| <i>BRCA1/BRCA2</i> VUS                                                     | 81.36         | Patient receives result as agreed during appointment either by letter (45%), phone call (45%) or face-to-face appointment (10%) – same as <i>BRCA1/BRCA2</i> negative                                         | Primary data collection at CUH NHS Foundation Trust |
| <i>BRCA1/BRCA2</i> positive                                                | 95.09         | Patient receives result as agreed during appointment either by letter or phone call (85%) or by face-to-face appointment (15%)                                                                                | Primary data collection at CUH NHS Foundation Trust |
| New proposed pathway                                                       |               |                                                                                                                                                                                                               |                                                     |
| Referred to cancer genetic service                                         | 47.28         | Patient details collected by genetic counsellor and processes eligibility for genetic testing over the phone via family history                                                                               | Primary data collection at CUH NHS Foundation Trust |
| Eligible for test, offered appointment and attends cancer genetics service | 144.82        | Patient attends 15 minute appointment with genetic counsellor (70% led) and clinical geneticist (30% led) to provide counselling and offer genetic                                                            | NHS reference costs: financial year 2014-2015       |

|                                                     |        |                                                                                                                                    |                                                     |
|-----------------------------------------------------|--------|------------------------------------------------------------------------------------------------------------------------------------|-----------------------------------------------------|
|                                                     |        | test                                                                                                                               |                                                     |
| Offered and accepts <i>BRCA1/BRCA2</i> genetic test | 850.00 | NHS test price at Addenbrooke's Hospital. Test involves sequencing of the entire coding region of genes plus copy number analysis. | UKGTN website                                       |
| <i>BRCA1/BRCA2</i> negative                         | 57.68  | Patient receives result by letter                                                                                                  | Primary data collection at CUH NHS Foundation Trust |
| <i>BRCA1/BRCA2</i> VUS                              | 23.19  | Patient receives result by letter with 20% of patients also receiving a phone call from genetic counsellor                         | Primary data collection at CUH NHS Foundation Trust |
| <i>BRCA1/BRCA2</i> positive                         | 385.82 | Patient received result by letter and an appointment is made for patients to attend and discuss results with clinical geneticist   | Primary data collection at CUH NHS Foundation Trust |

**Table S1:** Estimated resources, test unit costs and assumptions (2015)

| <b>Mutations</b> |             |                                                      |                      |            |                  |              |              |           |                 |
|------------------|-------------|------------------------------------------------------|----------------------|------------|------------------|--------------|--------------|-----------|-----------------|
| <i>ID</i>        | <i>Gene</i> | <i>DNA level</i>                                     | <i>Protein level</i> | <i>Age</i> | <i>Cancer</i>    |              |              |           |                 |
|                  |             |                                                      |                      |            | <i>Pathology</i> | <i>Grade</i> | <i>Stage</i> | <i>MS</i> | <i>BOADICEA</i> |
| 100              | BRCA1       | c.325_325dupGA                                       | Leu1086fs            | 54         | SP               | 3            | 4            | 13        | 3.2             |
| 126              | BRCA1       | c.2475delC                                           | Asp825fs             | 75         | SP               | 3            | 3c           | 14        | 1.4             |
| 63               | BRCA1       | c.4868C>G                                            | Ala1623Gly           | 67         | SP               | 3            | 3c           | 20        | 4.5             |
| 185              | BRCA1       | c.3307_3308insC                                      | Cys1103Serfs*2       | 40         | SP               | 3            | 3c           | 25        | 46.1            |
| 8                | BRCA2       | c.4154C>G                                            | Ser1385Ter           | 65         | SP               | 3            | 3            | 24        | 41.6            |
| 218              | BRCA1       | c.3193dupG                                           | Asp1065fs            | 55         | SP               | 3            | 3c           | 25        | 70.4            |
| 134              | BRCA1       | c.1961delA                                           | Lys654fs             | 52         | SP               | 3            | 3c           | 23        | 27.3            |
| 17               | BRCA2       | c.517-2A>G                                           |                      | 67         | SP               | 3            | 3            | 22        | 13.2            |
| 40               | BRCA2       | c.5247T>G                                            | Tyr1749Ter           | 65         | EC <sup>†</sup>  | 3            | 1c           | 21        | 7.1             |
| 59               | BRCA1       | c.3756-59delGTCT                                     | Ser1253fs            | 54         | SP               | 3            | 3b           | 21        | 16.4            |
| 14               | BRCA1       | c.122A>G                                             | His41Arg             | 52         | SP               | 3            | 3c           | 26        | 2.1             |
| 191              | BRCA2       | c.6275_6276delTT                                     | Leu2092fs            | 68         | SP               | 3            | 3c           | 11        | 1.4             |
| 137              | BRCA2       | c.4154C>G                                            | Ser1385Ter           | 66         | SP               | 3            | 4            | 11        | 0.7             |
| 90               | BRCA1       | c.1360_1361delAG                                     | Ser 454Ter           | 59         | SP               | 3            | 1b           | 26        | 60.2            |
| 168              | BRCA2       | Het del ex14-16                                      |                      | 52         | SP               | 3            | 1c           | 44        | 89.1            |
| 140              | BRCA1       | c.2641G>T                                            | Glu881Ter            | 49         | SP               | 3            | 3c           | 21        | 6.3             |
| 214              | BRCA1       | c.5153-26A>G                                         |                      | 53         | SP               | 3            | 3c           | 13        | 5.5             |
| 232              | BRCA1       | c.4524G>A                                            | Trp1508Ter           | 45         | SP               | 1            | 1c           | 13        | 3.8             |
| <b>VUS</b>       |             |                                                      |                      |            |                  |              |              |           |                 |
| <i>ID</i>        | <i>Gene</i> | <i>DNA level</i>                                     | <i>Protein level</i> | <i>Age</i> | <i>Cancer</i>    |              |              |           |                 |
|                  |             |                                                      |                      |            | <i>Pathology</i> | <i>Grade</i> | <i>Stage</i> | <i>MS</i> | <i>BOADICEA</i> |
| 19               | BRCA2       | c.5278T>G                                            | Ser1760Ala           | 76         | SP               | 3            | 3c           | 14        | 4.4             |
| 31               | BRCA2       | c.4068G>A                                            | Leu1356Leu           | 70         | SP               | 3            | 4            | 10        | 0.3             |
| 102              | BRCA2       | c.8072C>T                                            | Ser2691Phe           | 51         | SP               | 3            | 3c           | 15        | 1.8             |
| 101              | BRCA2       | c.8111C>T                                            | Ser2704Phe           | 67         | SP               | 3            | 3c           | 18        | 11.8            |
| 162              | BRCA2       | c.6403A>C                                            | Asn2135His           | 68         | SP               | 3            | 3b           | 10        | 0.9             |
| 215              | BRCA1       | c.1534C>T                                            | Leu512Phe            | 52         | EC               | 1            | 1a           | 13        | 6.8             |
| 54               | BRCA2       | c.1798T>C                                            | Tyr600His            | 72         | SP               | 3            | 3c           | 11        | 0.8             |
|                  | BRCA2       | c.1909+8_1909+9delTG at the exon10/intron10 boundary |                      |            |                  |              |              |           |                 |
|                  | BRCA2       | c.7504C>T                                            | Arg2502Cys           |            |                  |              |              |           |                 |
| 166              | BRCA2       | c.506A>G                                             | Lys169Arg            | 72         | SP               | 3            | 1c           | 10        | 0.5             |
| 176              | BRCA2       | c.1460C>A                                            | Ala487Glu            | 41         | SP               | 3            | 3c           | 21        | 28.4            |
| 111              | BRCA2       | c.8905G>A                                            | Val2969Met           | 83         | SP               | 3            | 3c           | 10        | 0.1             |
| 150              | BRCA1       | c.1534C>T                                            | Leu512Phe            | 72         | SP               | 3            | 3c           | 10        | 0.6             |
| 20               | BRCA2       | c.68-7T>A                                            |                      | 74         | SP               | 3            | 3c           | 10        | 0.7             |
| 1                | BRCA1       | c.1563A>G                                            | Ala521Ala            | 55         | EC               | 1            | 1a           | 14        | 4.1             |
| 28               | BRCA2       | c.223G>C                                             | Ala75Pro             | 70         | EC               | 3            | 1c           | 30        | 4.4             |
| 223              | BRCA2       | c.967G>T                                             | Val323Leu            | 64         | EC               | 2            | 1c           | 10        | 2.5             |

**Table S2. BRCA1/BRCA2 Mutations and VUS identified in the study**

<sup>†</sup>= High grade adenocarcinoma with features in favour of a grade 3 endometrioid adenocarcinoma

|                       | Current patient testing pathway (£) |                                |                               | GTEOC patient testing pathway (£) |                                |                               |
|-----------------------|-------------------------------------|--------------------------------|-------------------------------|-----------------------------------|--------------------------------|-------------------------------|
|                       | Budget                              | Average cost per BRCA positive | Average cost per test offered | Budget                            | Average cost per BRCA positive | Average cost per test offered |
| Base case, £850, 50%  | 142,702                             | 11,892                         | 2,265                         | 253,617                           | 14,919                         | 1,093                         |
| Cost of test          |                                     |                                |                               |                                   |                                |                               |
| £650                  | 130,102                             | 10,842                         | 2,065                         | 207,217                           | 12,189                         | 893                           |
| £499                  | 120,589                             | 10,049                         | 1,914                         | 172,185                           | 10,129                         | 742                           |
| £350                  | 111,202                             | 9,267                          | 1,765                         | 137,617                           | 8,095                          | 593                           |
| £190                  | 101,122                             | 8,427                          | 1,605                         | 100,497                           | 5,912                          | 433                           |
| Percentage referral   |                                     |                                |                               |                                   |                                |                               |
| 0%                    | 105,772                             | 8,814                          | 1,679                         | 253,617                           | 14,919                         | 1,093                         |
| 25%                   | 124,454                             | 10,371                         | 1,975                         | 253,617                           | 14,853                         | 1,093                         |
| 75%                   | 160,950                             | 13,412                         | 2,554                         | 253,617                           | 14,853                         | 1,093                         |
| 100%                  | 179,197                             | 14,933                         | 2,844                         | 253,617                           | 14,853                         | 1,093                         |
| GTEOC age cut-off <70 |                                     |                                |                               |                                   |                                |                               |
| £850, 50%             | 142,702                             | 11,892                         | 2,265                         | 148,429                           | 9,895                          | 1,091                         |
| Scenario              |                                     |                                |                               |                                   |                                |                               |
| £650, 50%, <70 age    | 130,102                             | 10,842                         | 2,065                         | 121,229                           | 8,082                          | 891                           |

**Table S3:** Base case analysis results plus sensitivity analysis of patient testing pathway budget, average patient pathway cost of BRCA positive, and average patient pathway cost per genetic test offered for the 232 women eligible for the GTEOC study. In the GTEOC testing pathway all the patients were given the genetic test. The budget is the overall cost of all patients receiving eligibility checks, counselling and genetic testing plus post-test work-up i.e., the average cost per test offered is the total budget divided by the number of tests offered which is 232. For the current testing pathway, we calculated the Manchester score for all patients and based on this, 63 patients would have been eligible for genetic testing and offered the test. For these patients the full work-up cost was calculated from eligibility check to test and post-test work-up. For the base case we then assumed that 50% of the remaining 169 patients would have still been referred for genetic test counselling and so would incur those costs. We calculated for these 84 patients the cost of eligibility and genetic counselling but did not include test costs as these patients did not meet test criteria. For

the remaining 85 patients we only included the cost of checking eligibility for the referral. The sum of these three sets of costs for the 232 patients equal the budget and the average cost per test offered is that budget divided by the number of tests offered (i.e., total budget divided by 63).

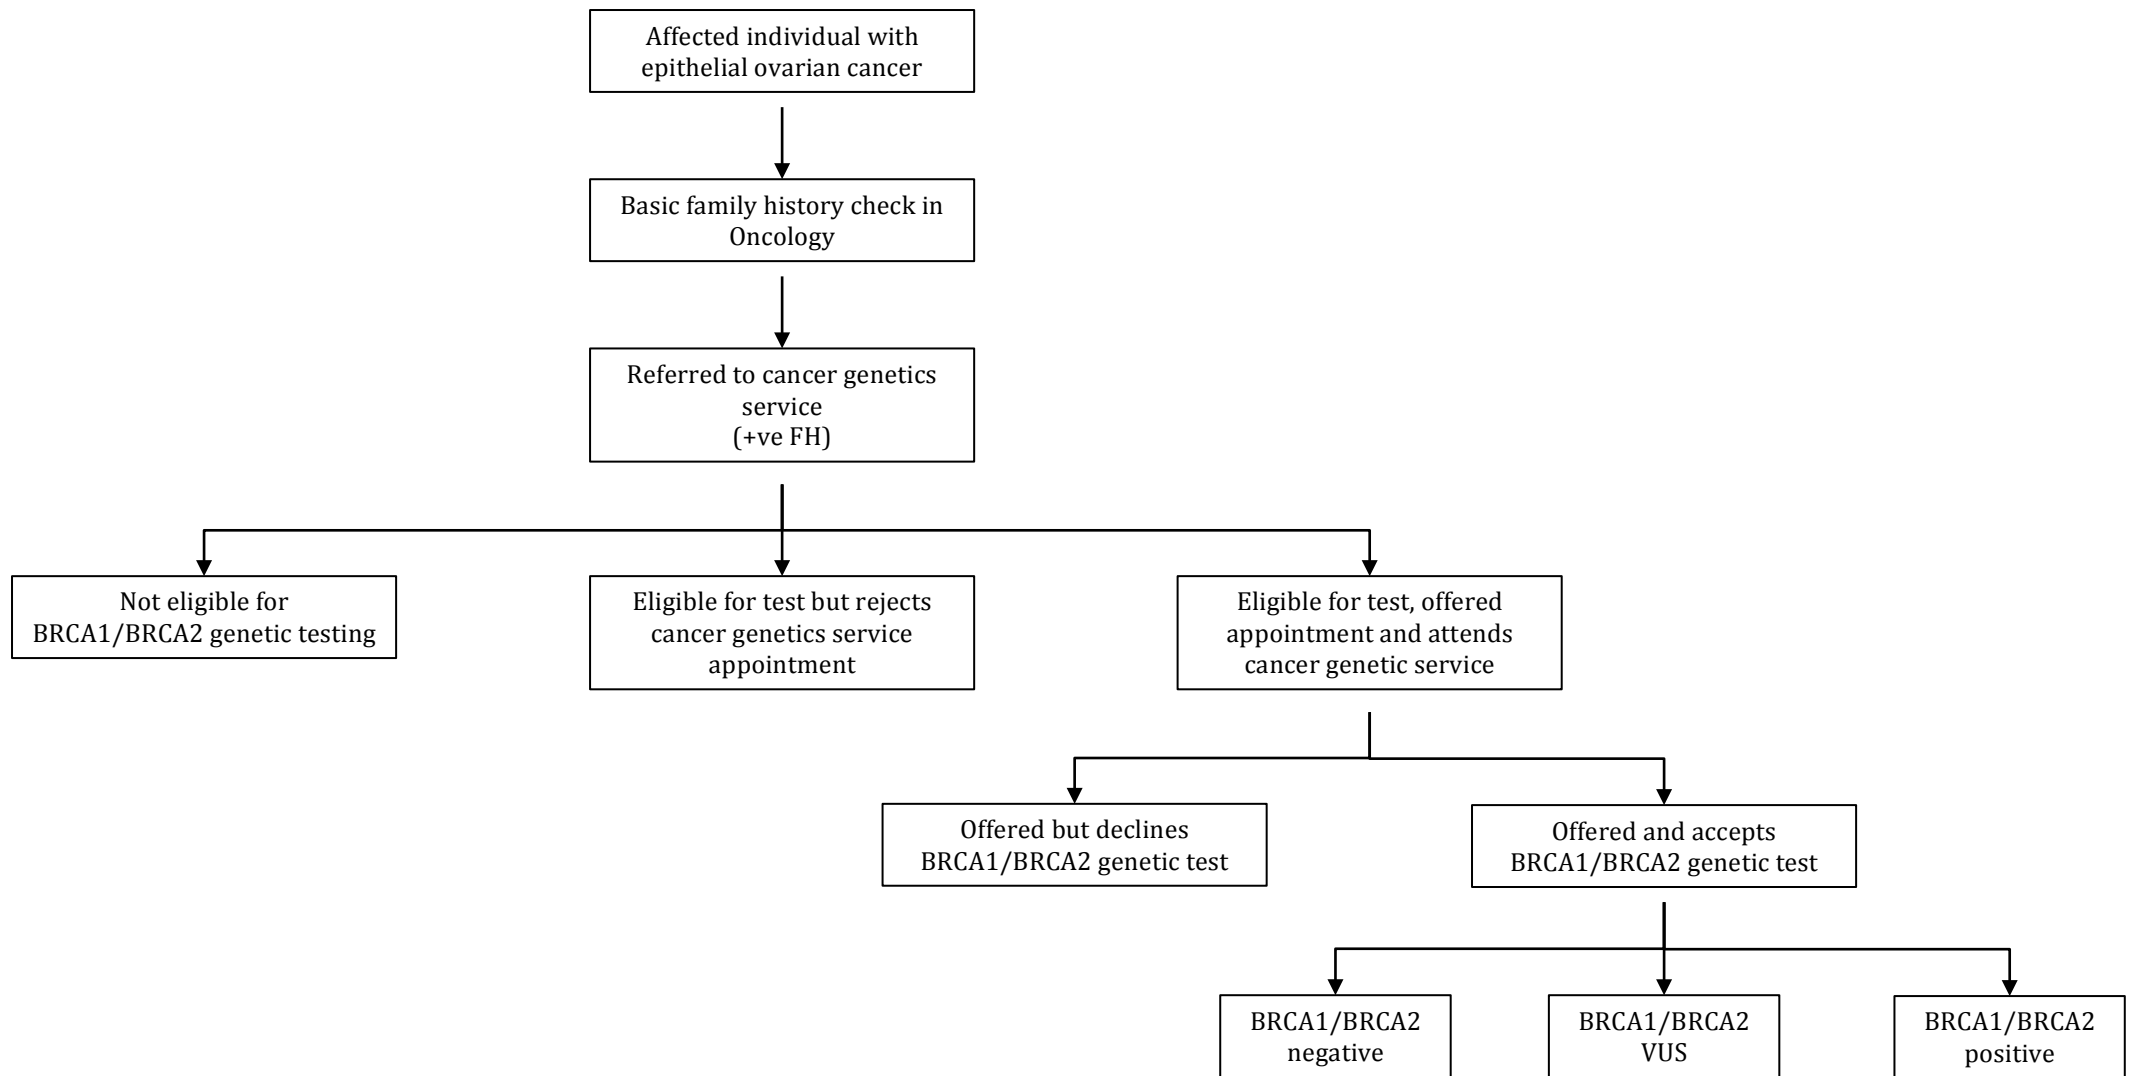

Figure S1: Patient pathway for the current provision of *BRCA1/BRCA2* testing in epithelial ovarian cancer patients

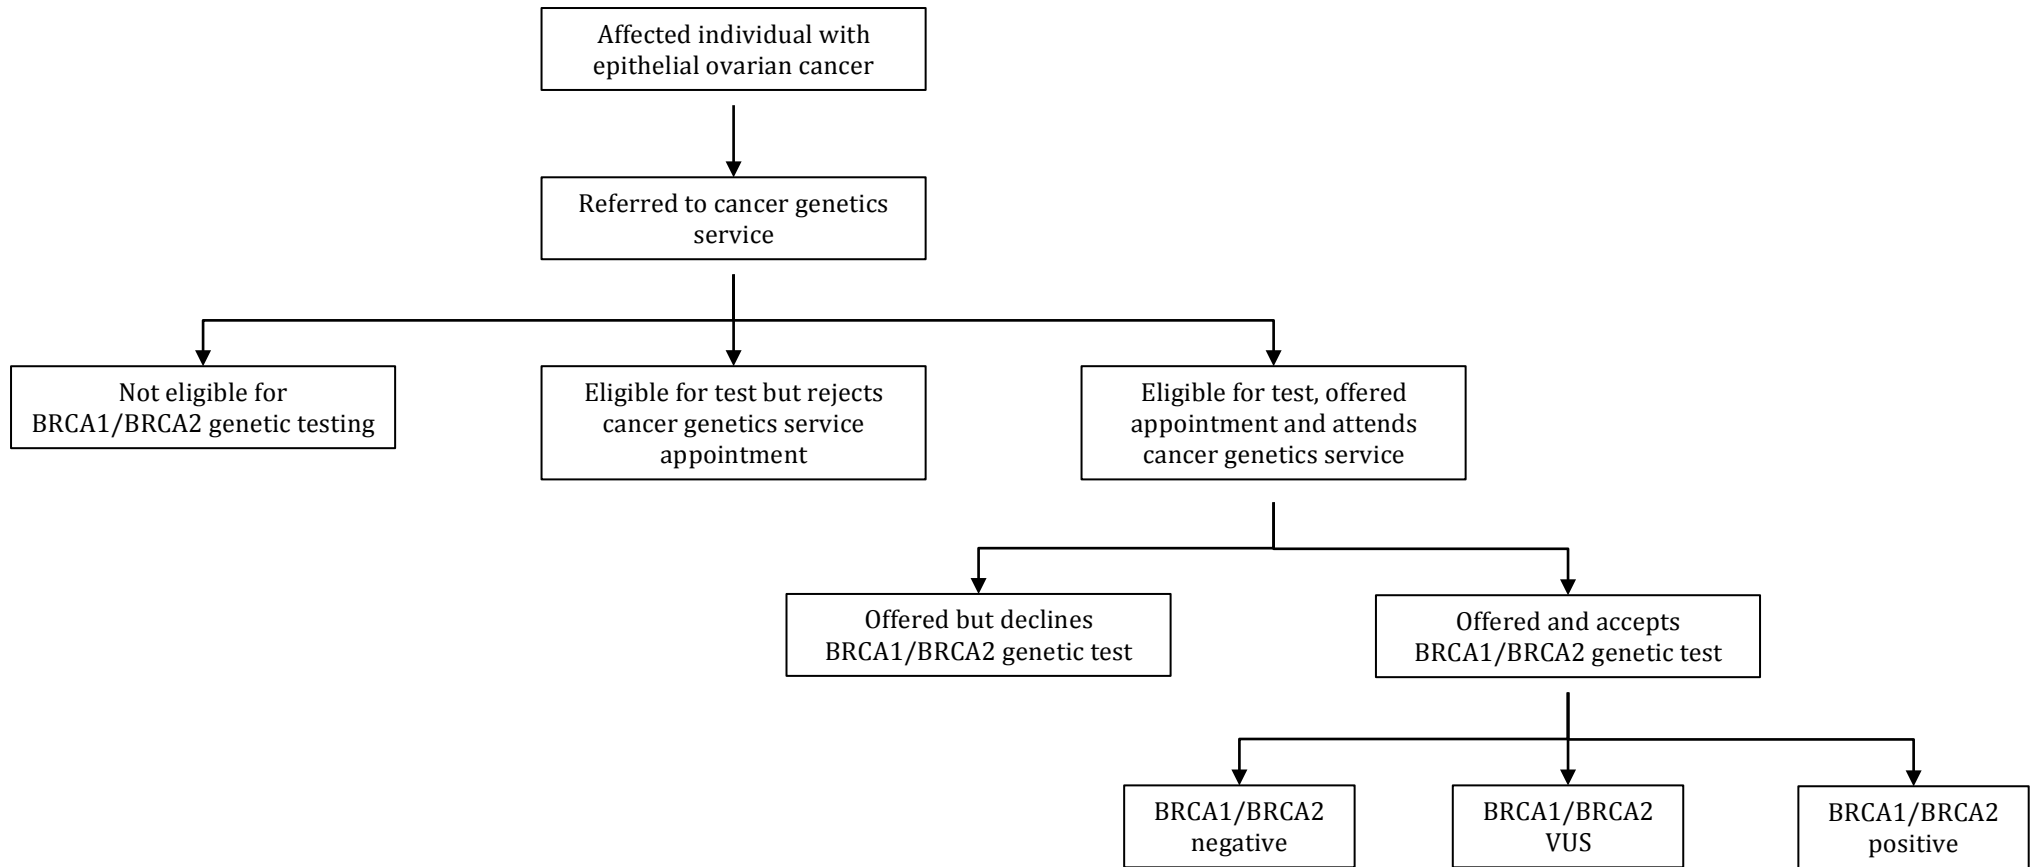

Figure S2: Proposed patient pathway for the provision of *BRCA1/BRCA2* testing in epithelial ovarian cancer patients from the GTEOC study.
